# Supplementary material
Source: PubMed Central journal article supplement (PMC4313833)
Supplement: pnas.201412833SI.pdf [file pnas.201412833SI.pdf]

# Supporting Information

Leclerc et al. 10.1073/pnas.1412833112

**Table S1. Covariate results for multivariate analysis of radiographic vasospasm and delayed cerebral ischemia**

| Outcome         | CV-induced DCI |                | No. of vessels with mild CV |                | No. of vessels with moderate CV |                | No. of vessels with severe CV |                   | Global CV        |                   |
|-----------------|----------------|----------------|-----------------------------|----------------|---------------------------------|----------------|-------------------------------|-------------------|------------------|-------------------|
|                 | CI             | <i>P</i> value | CI                          | <i>P</i> value | CI                              | <i>P</i> value | CI                            | <i>P</i> value    | CI               | <i>P</i> value    |
| Hp phenotype*   | 0.706–6.00     | 0.180          | 0.536–1.38                  | 0.531          | 1.12–2.98                       | <b>0.014</b>   | 1.33–11.5                     | <b>0.008</b>      | 1.39–11.9        | <b>0.014</b>      |
| Age             | 0.941–1.01     | 0.150          | 0.992–1.02                  | 0.365          | 0.962–0.992                     | <b>0.003</b>   | 0.887–0.954                   | <b>&lt;0.0001</b> | –0.535 to –0.215 | <b>&lt;0.0001</b> |
| GCS             | —              | —              | 0.940–1.13                  | 0.563          | 0.849–1.07                      | 0.366          | 0.629–1.17                    | 0.210             | –1.73–0.682      | 0.195             |
| WFNS            | —              | —              | 0.667–1.20                  | 0.503          | 0.751–1.51                      | 0.720          | 0.462–2.03                    | 0.940             | –2.10–4.85       | 0.869             |
| Hunt–Hess grade | —              | —              | 0.885–1.78                  | 0.245          | 0.677–1.57                      | 0.881          | 0.230–1.63                    | 0.210             | –5.87–2.88       | 0.442             |
| Aneurysm size   | —              | —              | 0.922–1.07                  | 0.850          | 0.924–1.08                      | 0.967          | 0.754–0.989                   | 0.062             | –1.66–0.033      | <b>0.043</b>      |
| Treatment type  | —              | —              | 0.471–1.19                  | 0.222          | 0.596–1.61                      | 0.938          | 2.13–18.0                     | <b>0.001</b>      | 0.953–11.3       | <b>0.047</b>      |

\*For comparison between Hp2-2 and Hp1-1/2-1.
